# Supplementary material for: Femtosecond signatures of optically induced magnons before ultrafast demagnetization
Source: Research Square preprint supplement (doi:10.21203/rs.3.rs-7456026/v1), 2025-09-12
Supplement: Supplementary file 1 [file 3704b24a1ab6aff9a8a36fe3.docx]

**Supplementary Information**

Femtosecond signatures of optically induced magnons before ultrafast demagnetization

Reza Rouzegar1, Oliver Franke1, Gal Lemut1, Oliver Gueckstock1, Junwei Tong1, Dieter Engel2, Xianmin Zhang3, Georg Woltersdorf4, Piet W. Brouwer1, Tobias Kampfrath1, Quentin Remy1

1Department of Physics, Freie Universität Berlin, 14195 Berlin, Germany
2Max-Born-Institut für nichtlineare Optik und Kurzzeitspektroskopie, 12489 Berlin, Germany
3Key Laboratory for Anisotropy and Texture of Materials (Ministry of Education), School of Material Science and Engineering, Northeastern University, Shenyang 110819, China
4Institut für Physik, Martin-Luther-Universität Halle, 06120 Halle, Germany

# S1 All the fits

|  |
| --- |
| **Figure S1:** Comparison of the Stoner model (bi-exponential) and electron-magnon model (tri-exponential) fit for Co. The blue line shows the experimental data. (a) and (b) show the electron-magnon model fit while (c) and (d) show the Stoner model fit. (b) and (d) show the same results as (a) and (c) respectively but for a shorter time range. |

|  |
| --- |
| **Figure S2:** Comparison of the Stoner model (bi-exponential) and electron-magnon model (tri-exponential) fit for Fe. The blue line shows the experimental data. (a) and (b) show the electron-magnon model fit while (c) and (d) show the Stoner model fit. (b) and (d) show the same results as (a) and (c) respectively but for a shorter time range. |

|  |
| --- |
| **Figure S3:** Comparison of the Stoner model (bi-exponential) and electron-magnon model (tri-exponential) fit for CoFe. The blue line shows the experimental data. (a) and (b) show the electron-magnon model fit while (c) and (d) show the Stoner model fit. (b) and (d) show the same results as (a) and (c) respectively but for a shorter time range. |

|  |
| --- |
| **Figure S4:** Comparison of the Stoner model (bi-exponential) and electron-magnon model (tri-exponential) fit for CoFeB. The blue line shows the experimental data. (a) and (b) show the electron-magnon model fit while (c) and (d) show the Stoner model fit. (b) and (d) show the same results as (a) and (c) respectively but for a shorter time range. |

|  |
| --- |
| **Figure S5:** Comparison of the Stoner model (bi-exponential) and electron-magnon model (tri-exponential) fit for NiFe. The blue line shows the experimental data. (a) and (b) show the electron-magnon model fit while (c) and (d) show the Stoner model fit. (b) and (d) show the same results as (a) and (c) respectively but for a shorter time range. |

|  |
| --- |
| **Figure S6:** Comparison of the Stoner model (bi-exponential) and electron-magnon model (tri-exponential) fit for Py. The blue line shows the experimental data. (a) and (b) show the electron-magnon model fit while (c) and (d) show the Stoner model fit. (b) and (d) show the same results as (a) and (c) respectively but for a shorter time range. |

# S2 Model solution

The reason why, as we noted several times in the Methods section, the variation of parameters does not impact much the extracted dynamical parameters is because the matrix essentially serves to change the relative influence of the different interactions between the subsystems. We discuss this in details below, together with other important features of the model. We postpone the discussion of all interactions and alternative mechanisms to the next section and focus our attention here only on em, ml, sl and el scattering. The general solution of our model involves the inversion and diagonalization of 6×6 matrices and therefore does not provide a helpful intuitive picture of the dynamics, despite its simplicity compared to fully microscopic models. Therefore, we derive an approximate solution based on the concept of partial equilibrium: for each interaction, the system is said to be in partial equilibrium with respect to that interaction if the time elapsed after some perturbation is much larger than the interaction characteristic time. The partial equilibrium is characterized by the interaction specific equilibrium conditions specified in the Methods section. In our materials, the system is actually never in a state of partial equilibrium with any interaction unless a complete equilibrium is reached, since all the important characteristic times to describe the dynamics are fairly close to each other. The analytical formulae that we present below can therefore only provide an estimate of the order of magnitude of each term in the solution.

Before we derive these formulae, we briefly discuss the general form of this solution. To obtain it numerically, one needs first to diagonalize the total scattering matrix in equation (11). In the basis that diagonalizes this matrix, the solutions are single exponentials with inverse characteristic times given by its eigenvalues. Going back to the original basis, it is found that every thermodynamic variable is a linear combination of such exponentials:

Where are some constants given by the matrix elements of only. This equation is valid after the laser pulse arrives at . At this instant, the electronic temperature rises instantaneously (before convolution by our time resolution function). Because we explicitly keep track of energy and particle number (while the lattice is assumed to be a perfect spin sink where angular momentum can be lost), the corresponding conservation laws always lead to two zero eigenvalues i.e. infinite characteristic times. Thus, the solution is characterized by 4 characteristic times and the 4 corresponding amplitudes. Additionally, the (spin averaged) conduction electrons chemical potential (in general) and temperatures contain a non-zero offset corresponding to the infinite characteristic times. Physically, this corresponds to the fact that a finite amount of energy is permanently (in this model) deposited in the system. The offset is absent for the spin voltage and magnon chemical potential because of the (complete) equilibrium conditions pertaining to these quantities.

First, we assume the system is at some time such that or implying that it is in partial equilibrium with respect to the em interaction. Since the other interactions do not influence the dynamics at this timescale, the corresponding eigenvalue of the matrix will be . Because em scattering corresponds to a transfer of both energy and angular momentum, it turns out that the corresponding eigenvalue is doubly degenerate. The presence of the other interactions (in the main text, ml and el scattering) lifts this degeneracy. For iron, denoting the other eigenvalue , we find from the exact solution 9.6 fs and 9.4 fs while 9.6 fs. Thus, the partial equilibrium assumption leads to a very good estimate of the initial dynamics. Because both eigenvalues are almost degenerate, it is not possible to distinguish them experimentally. From the conservation laws and equilibrium conditions of em scattering, one can easily derive the amplitude of the generated spin voltage and magnon chemical potential, in the absence of other interactions:

Here, the superscript ‘peq’ indicates that this value is only true for partial equilibrium (of em scattering) and denotes the matrix elements of . This equation can be understood by noting that a diagonal element of corresponds to a heat capacity () or a (spin) susceptibility (), while the off-diagonal elements correspond to conversion elements. For instance, converts a change of magnon temperature into angular momentum. The second factor in equation (S2) describes the total temperature increase of the system in partial equilibrium after it has absorbed the energy density . The denominator of this term is the relevant heat capacity (i.e. how energy is converted into temperature) containing the heat capacities of the conduction electrons and the magnons plus a third term. The third term describes a process where an increase in temperature is first converted into angular momentum (), this angular momentum giving rise to a certain change of spin voltage (or magnon chemical potential) through a corresponding total spin susceptibility before being finally converted back into energy (). The temperature rise of the second factor is then converted into angular momentum due to the numerator of the first factor () and finally into spin voltage and magnon chemical potential via the total spin susceptibility. The latter consists in the conduction electron ( and magnon () spin susceptibilities together with which describes an additional (not negligible) contribution to the conduction electron spin susceptibility due to a change of (spin averaged) chemical potential. In simpler terms, is the spin susceptibility at constant chemical potential while is the spin susceptibility at constant number of electrons. For iron (parameters of Extended data Table 1) and an absorbed fluence of 0.03 mJ/cm2 corresponding to our experiments, we find 1.5 meV while the exact calculation leads to a maximum amplitude 1.12 meV i.e. a 25% difference. Equation (S2) still gives a good estimate for the amplitude of the spin voltage provided that em scattering is the fastest scattering mechanism. In this case, the estimated amplitude mostly depends on because it is the largest term of the first denominator while the second denominator is dominated by the electron heat capacity which is a rather well-known quantity, up to some factor of order unity. is not so sensitive on the details of the magnon DOS (see below) and is therefore not expected to determine the amplitude of the spin voltage, also up to some factor of order unity. , on the other hand, depends on the magnon gap which is not well-known for our samples. Measurements of the magnon gap for our samples, via for instance all optical ferromagnetic resonance measurements1, is beyond the scope of this paper and will be the topic of future works. Most likely2, the gap is well below 1 meV which will strongly suppress the amplitude of the spin voltage. For a magnon gap of around 40 µeV,3 is around 20 times larger than what is given in Extended data Table 1 and the spin voltage is reduced accordingly with 58 µeV. We note that with our numerical parameters to compute the magnon DOS, including such a small gap has a negligible influence on the calculated values of all . If the amplitude of the spin voltage matters, one should thus use equation (38) for while the other ones always have to be computed numerically.

In a second time, we assume . If the spin dissipation in the lattice happens only through the spin stored in conduction electrons (i.e. sl scattering), we can estimate the spin dissipation time via the following reasoning. Because , . Let us assume that for an infinitesimally short amount of time , em scattering is turned off. Then, we get and . Then we turn em scattering back on and let the system reach partial equilibrium instantaneously with respect to em scattering. We now find that

The second equality serves to define which is an estimate for the next largest eigenvalue (in the absence of electron-lattice scattering) of . We also define . Because is dominating the denominator of for all the studied materials, and the effect of spin flip scattering in the conduction electrons is very small at the subpicosecond timescale. Physically, the spin susceptibility of the magnons is very large, thus em scattering always forces the spin voltage to remain close to the magnon chemical potential. In other words, the conduction electrons prefer to satisfy the partial equilibrium condition of em scattering rather than the one of spin flip scattering for conduction electrons . For iron, 5.8 10-3. We thus always neglect this type of spin dissipation.

If instead the spin dissipation happens only through ml scattering, a similar reasoning leads to

The second equality serves to define which is the new estimate for the next largest eigenvalue of . We also define . The sign difference in the denominator of compared to comes from the convention for the sign of the magnon chemical potential. The absence of in the numerator of comes from conservation of energy during ml scattering. In this case, the numerator of contains and thus for all materials. For example, for iron, 0.97 leading to 55.6 fs which is almost identical to the exact value 55.7 fs. The terms in both and can be understood in a similar way as what was done for equation (S2). A similar analysis can be done for the other amplitudes and characteristic times in equation (S1) but we do not need it here.

The previous calculations show that as long as is the dominant term of

Changes in the values of the matrix will not change the extracted values of and when the fit is performed, but it will change the amplitude of the spin voltage. Note that the relevant “total” spin susceptibility depends on the initial conditions and relaxation mechanisms considered.

Below, we state a few other important points about our model.

1. *Rise time of and example of a full solution*

In Extended data Fig. 5a and b, we show the full solution of our model for Fe. It is more instructive however to look directly at the numerical values of and . These values are shown in Table S1. Because and are almost equal, we indeed see that the dynamics of the ferromagnet happens in three temporally distinct steps (Fig. 2). Since (see below), we see that this model gives a finite rise time of . We also note that a significant part of the conduction electron temperature dynamics is governed by em scattering () on top of the well-known effect of electron-lattice scattering (~ ). The former effect has already been discussed in previous works4–6. In particular, this bi-exponential decay of the electron temperature seems to be observable in Figure 3 of the work of Tengdin *et al.*4. Finally, we also see, as one would expect, that the amplitudes for the lattice temperature dynamics are only sizeable for .

1. *Proportionality between , and*

In Extended data Fig. 5c, we show that *, and*  are indeed approximately proportional in our model, as demonstrated experimentally by the equality between the signals in *F*/Pt and *F* samples (see Methods). is directly obtained from the sum of the second and fourth line of the matrix product , see Methods. This proportionality comes from the fact that the spin dissipation, which gives rise to is directly proportional to by definition of ml scattering, and is almost proportional to due to the strong em scattering. The difference between these two quantities comes exactly from the fact that we neglected spin flip scattering of the conduction electrons. Even though the influence of the latter scattering mechanism on the magnetization dynamics is very small (see below), including it (with a similar scattering time as for ml scattering) exactly accounts for the tiny difference observable in Extended data Fig. 5c.

1. *The case of no magnon dispersion*

The magnon dispersion relation comes from the transverse part of the Heisenberg Hamiltonian7. In the mean field approximation, the latter is neglected and every spin excitation has the same energy. We discuss this case in detail in section S4 and show that the only difference compared to our model, in the linear regime, is a different magnon DOS and thus different values of . For iron, calculating in the case of no dispersion, we obtain 0.34 and -1.2 10-2. This drastic change in the magnon DOS mostly affects as is reduced by 40% while is reduced by 99.3% i.e. more than two orders of magnitude. Thus, ml scattering is inefficient in this case as conduction electrons then prefer the partial equilibrium with respect to spin flip scattering of conduction electrons. Taking the same value of as for ml scattering in iron (54.2 fs), we find 160 fs. The exact value is 74 fs. This shows (i) that the validity of equations (S3) and (S4) depends on and (ii) there can be a lot of mixing between the eigenvalues of i.e. the characteristic times are not necessarily equal to the scattering times for each interaction.

1. *Mixing of the eigenvalues*

The latter fact is obvious since there can be many interactions existing in the system while only four characteristic times can be non-zero. This mixing depends both on , as we just showed through an example, but also on the values of the scattering times of each interaction. In Extended data Fig. 5d, we show this effect when the value of the em scattering time is varied. As increases, an anticrossing like behavior is observed. In particular, for sufficiently large , the smallest eigenvalue is almost equal to . For the values of in our samples, we find that this mixing is rather small for and . It becomes much larger however for (see Table S2) and in general, much more complex mixing curves exist as a function of the other scattering times or at higher values of those scattering times.

|  |  |  |  |  |  |  |
| --- | --- | --- | --- | --- | --- | --- |
| (fs) | 9.4 | 9.6 | 55.7 | 380.9 |  |  |
|  | 1 | -1.20 | 0.23 | -0.025 | 0 | 0 |
|  | 1 | -1.20 | 0.23 | -0.025 | 0 | 0 |
|  | 1 | 0.0087 | 0.035 | 0.88 | 0.11 | 0 |
|  | 1 | -0.043 | -1.08 | 0.12 | 0 | 0 |
|  | -1.14 | -0.0071 | 0.028 | 1 | 0.11 | 0 |
|  | -0.024 | -2 10-4 | -0.0052 | -0.97 | 1 | 0 |
| **Table S1**: Characteristic times and amplitudes in front of each corresponding exponential, for each thermodynamic quantity. These amplitudes have been normalized such that, for each thermodynamic quantity, the largest amplitude is one. | | | | | | |

| FM | (fs) | (fs) | (fs) | (fs) | (fs) | (fs) |
| --- | --- | --- | --- | --- | --- | --- |
| Co | 4.5 | 62.7 | 354.8 | 4.5 | 60.2 | 300 |
| CoFe | 6.3 | 71.0 | 346.8 | 6.3 | 66.2 | 300 |
| CoFeB | 7.4 | 66.4 | 347.0 | 7.4 | 61.8 | 300 |
| Fe | 9.4 | 55.7 | 380.9 | 9.6 | 54.2 | 200 |
| NiFe | 17.1 | 102.3 | 438.2 | 17.5 | 98.9 | 300 |
| Py | 13.9 | 179.6 | 438.3 | 14.1 | 175.0 | 300 |
| **Table S2** Characteristic times , , and the extracted scattering times and for each material. | | | | | | |

|  |
| --- |

# S3 Alternate mechanisms

In this section, we discuss the effect of other interactions and additional effects that can influence the dynamics of the system. Overall, even though all these effects are most likely present in our systems, we find that they are not sufficient to explain our results on their own and their effect on the (normalized!) spin voltage and magnetization dynamics is small. In particular, only em scattering can explain the rise time of the spin voltage. This can be intuitively understood from the fact that magnons hold most of the angular momentum, and therefore a progressive increase of electronic angular momentum must come from the magnon subsystem.

1. *Spin flip scattering of conduction electrons*

Although we have already partially discussed this interaction in the precedent section, we still need to discuss one last scenario with this interaction. When is shorter than , the spin voltage rise time is mostly determined by , just like is dominated by when the latter is much shorter than (Extended data Fig. 5d). In order to fit the data however, one needs in this case to also consider ml scattering because of an effect similar to was discussed in the context of equation (S3), i.e. em and sl scattering alone are insufficient to describe spin dissipation in the lattice.

However, with this assumption of a short , we find that and are no longer proportional, contrary to what our experiments show (see Extended data Fig. 2). This lack of proportionality is because the dynamics of , now mostly governed by spin flip scattering, is much faster than the dynamics of governed by e-m scattering and ml scattering. This scenario can thus be discarded.

1. *Spin conserving electron-magnon scattering*

From a microscopic point of view, spin conserving em scattering is a second order effect where an electron and a magnon interact to exchange energy (the electron absorbs the magnon before emitting another one with a different energy) while the em scattering we talked about so far is usually seen as a first order process (an electron absorbing or emitting a magnon)8, see however section S6 below. If we include this interaction, following the Methods, its main effect is to change . In the case of iron, if we assume that the spin conserving em scattering time is equal to , we get 4.7 fs. The second effect is to change the relative weight for the exponentials with characteristic times and . Typically, the spin voltage is now mostly determined by while the electron and magnon temperatures, as well as the magnon chemical potential, are given by . This means that the proportionality relationship between and is less verified than without this extra interaction. We note however that the spin conserving em scattering time is not in general a simple function of , and corresponds to a second order effect8. It is therefore likely that by a factor of order unity or more, in which case the proportionality between and is verified.

1. *Magnon-phonon scattering*

We can also consider magnon-phonon scattering (which we defined in the Methods as a scattering process that exchanges energy between magnons and the lattice, contrary to magnon-lattice scattering which exchanges angular momentum). This scattering is theoretically predicted to have a negligible impact on the magnetization dynamics below 1 ps and the corresponding scattering times are estimated to reach up to 100 ps or more6,9–11. First, we note that this interaction cannot lead to a rise time of the spin voltage since it does not transfer anything to the electrons. Second, assuming a rather short magnon-phonon scattering time of 1 ps, we find that its main effect is to reduce from 380.9 fs to 319.1 fs. Thus, we can safely neglect this interaction altogether.

1. *The slope of the electronic DOS*

The slope of the DOS leads to non-zero values of , , and . By definition of these matrix elements, we see that they allow a mixing between energy (temperature) and angular momentum (chemical potential). In particular, an increase in temperature (due to the laser pulse) will generate a finite spin voltage. This effect, combined with electron-lattice and spin-flip scattering of the conduction electrons, allows us to recover the Stoner model as derived in our previous work12. The spin voltage and in this case rise instantaneously.

With em, el and ml scattering as the only interactions, the effect of the slope of the electronic DOS on the characteristic times is negligible. For iron, the same characteristic times are obtained up to the precision given in Table 1. The slope of the DOS will however change the values of the amplitudes in Table S1 by around 10% for iron. This does not impact the proportionality between and (up to an unmeasurable time shift less than 10 fs).

1. *Spin heat accumulation*

The slope of the electronic DOS can actually lead to a rise time even in the absence of em scattering if the laser pulse generates spin heat accumulation in the system i.e., if the temperatures and for both spin species of the conduction electrons are different after optical excitation. This can happen because each spin species can absorb a different amount of energy and because for a given amount of energy, a different temperature is obtained due to different heat capacities. Both effects are a consequence of the spin dependent DOS.

In this case, one then needs to include electron-electron (e-e) scattering to allow both temperatures to become equal in partial equilibrium. Following the procedure of the Methods, with now two electronic temperatures and and two electronic energies and , one can show that for each thermodynamic quantity pertaining to the electrons, there will be, in the rate equations, an extra term of the form with the e-e scattering time. In particular, the coefficient is non-zero for the chemical potentials only if the DOS has a non-zero slope, and is different for different thermodynamic quantities. Because is different for and , this will lead to a gradual increase of the spin voltage (in absolute value) with a characteristic time . Because may be estimated to be similar to the Drude scattering time13,14, which are comparable with our experimental values for , this mechanism could *a priori* explain the observed dynamics of the spin voltage.

We can however discard this effect for two reasons: (i) this effect is neither accompanied with a change in the total angular momentum in the system nor a change in the magnon reservoir, thus and would no longer be proportional anymore (ii) the sign of depends on the sign of the slope of the electronic DOS which is different for different materials, and so the sign of the measured spin voltage should change for different materials, which we do not observe.

# S4 Results from the s-d model of Beens *et al.*19

The main equation of the s-d model in the mean field approximation as derived by Beens *et al.*19 is an equation giving the change of the reduced magnetization (i.e. normalized to its value at zero Kelvin) of “d” electrons as a function of the spin voltage and the electronic (“s” electrons) temperature. We write it as follows (for a spin ½ associated with each localized “d” electron):

where is the s-d coupling constant of the model, is the electronic DOS per atom for the spin species , and is the spin splitting of the “d” electrons. When is dominated by the d-d exchange interaction, the mean field approximation leads to with the material Curie temperature. Consistently with our model, the relevant characteristic time, which we call , obtained from this equation is the one such that this equation can be written in the linear regime as

Linearizing equation (S9) such that 20, we obtain, consistently with the definition of Beens *et al.*19

Where the superscript indicates that the value of the respective quantity must be taken as the equilibrium room temperature value. This leads to19 = . This is indeed independent of room temperature and scales with the inverse of the Curie temperature, consistently with our measurements shown in Fig. 4. Experimentally, we observe a small change of the characteristic time for em scattering as a function of temperature, of around 1 fs. Such a small temperature variation is also a feature of this model if one considers that the electronic DOS is not constant at the Fermi level but has a non-zero slope. Repeating the calculations of Beens *et al.*19 to consider such possibility modifies the first bracket of equation (S9) and leads to

where is the slope of the electronic DOS per atom for the spin species . Note that now depends on temperature explicitly as well as implicitly through which does not cancel out anymore. If the exchange splitting contains a contribution due to s-d exchange, one should use where is the d-d exchange and is the equilibrium spin density of the “s” electrons. To estimate the order of magnitude of this effect, we choose eV (which leads to a Curie temperature of 1100 K for CoFeB), (estimated from our *ab initio* calculation) and eV (which leads to fs similar to the em scattering time of our experiments for CoFeB). We find that across the range from 100 to 400 K, varies by around 0.2 fs. Although this model is very simplistic (it fails to quantitatively predict the temperature dependence of magnetization), it can qualitatively explain the weak temperature dependence of the em characteristic scattering time.

Finally, we briefly discuss how this model compares to our model with magnons. In the mean field approximation s-d model (for d electrons with spin ½), the spin excitations of the “d” electrons correspond to promoting an electron with spin (say) up to the energy level with spin down. Because the effect of the transverse part of the Heisenberg Hamiltonian is neglected in this approximation, all the spin excitations have the same energy. Thus, in the mean field approximation, the spin excitations may be seen as Einstein/optical magnons i.e. magnons with a flat dispersion relation. The similarity can also be seen more mathematically by defining the number of “magnons” as the number density of spins excited to the spin down energy level. The identity (with , and ) is similar to one of the defining equations of the Holstein-Primakoff approximation with the magnon number operator in wavevector space and the dynamics equation for obtained from equation (S9) is

with , which becomes

at low temperature where is small and where the Holstein-Primakoff approximation is valid. This equation is essentially the dynamic equation for a single magnon mode with energy and scattering rate as defined by Tveten *et al.*21. Thus, in our model, we can recover the low temperature mean field approximation s-d model in the linear regime by using for the magnon dispersion relation a constant given by .

This analogy can be highlighted even further by noting that one can define for those spin excitations a chemical potential from , with is the free energy, being the internal energy and the entropy. From the mean field Hamiltonian, one gets , when the double counting of terms is properly corrected. Overall:

Which gives the right equilibrium condition . Out of equilibrium, this chemical potential is not zero but directly given by the other thermodynamic quantities describing the system.

# S5 Electron-magnon scattering in the model of Manchon *et al.*22

The model of Manchon *et al.*22 is another microscopic model of UDM, valid for all temperatures and going beyond the mean-field and Holstein-Primakoff approximations, but only accounting for energy transfers between electrons, magnons and the lattice. Nevertheless, we can use it to estimate the temperature and Curie temperature dependence of em scattering times. Linearizing equation (28) of Ref. 22 for small temperature changes, we get

Where is the total magnetization of the ferromagnet as a function of room temperature and the proportionality factor is temperature independent. Thus, in this model also, the em scattering time also scales with the inverse of the Curie temperature. It gives however a temperature dependence of the scattering time. For our temperature range and a typical magnetization curve23, the magnetization varies by around 10 % which leads to a variation of the em scattering time of around 1 fs consistent with our measurements.

# S6 Additivity of electron and magnon energies

An important assumption in the phenomenological theory is the additivity of electron and magnon energies. At first sight, this additivity seems to be at odds with the presence of a large exchange interaction between conduction electrons and magnons/local magnetic moments. It is a natural consequence, however, of the “fluctuating-local-band theory” of itinerant ferromagnetism of Korenman, Murray, and Prange24, which considers the itinerant majority and minority bands with respect to the local magnetization direction , instead of the global equilibrium magnetization direction . Below, we briefly recall the essence of the arguments of Ref. 24.

We consider a simple model Hamiltonian describing free electrons coupled to a classical magnetic moment with . The first-quantized Hamiltonian for the electrons, which also includes the coupling to the magnetic subsystem, is

with the spin of the free electrons . If the exchange is small, spin flip scattering can be treated as a change in the occupation number of electrons or magnons, where the probability of a scattering event is given by Fermi’s golden rule (see Refs. 8,25 for a recent application in the context of electron-magnon scattering). However, if is large and if the magnetization varies sufficiently slowly in space, we expect the s electron spins to locally follow the spatial magnetization profile . Both conditions are met in typical itinerant ferromagnets at temperatures well below the Curie temperature26. The spin-flip scattering of electron spins to the magnetic moments is then not determined by but by the wavelength of magnons. (This becomes obvious in the hypothetical limit of infinite exchange interaction so that electron spin and magnetic moment are always aligned. In this scenario, the adiabatic theorem rules out spin flips, in contradiction to a diverging scattering rate from the naive of Fermi’s golden rule.)

In a more formal way, we write

and assume that are small everywhere in the system. We then apply the unitary transformation

with

where and . We consider small deviations from equilibrium and expand to second order in . This gives (*cf.* Ref. 24)

where

with the anticommutator . The large exchange interaction in causes a splitting of the electronic bands, but is otherwise independent of the local magnon density. Coupling between conduction electrons and magnons is described by , which depends on only through its spatial gradient. The first term of describes electron-magnon scattering. It is accounted for via the collision integral in the Boltzmann theory and scales not with but the wavelength of magnons. The second term describes a dependence of electron energies on the magnon density and, alternatively, of the magnon stiffness on the electronic density. Since this term involves the gradient of the magnetization, its effect is small as long as most magnons have a sufficiently long wavelength.

# References

1. van Kampen, M. *et al.* All-Optical Probe of Coherent Spin Waves. *Phys. Rev. Lett.* **88**, 227201 (2002).

2. Raquet, B., Viret, M., Sondergard, E., Cespedes, O. & Mamy, R. Electron-magnon scattering and magnetic resistivity in 3d ferromagnets. doi:10.1103/PhysRevB.66.024433.

3. Razdolski, I. *et al.* Nanoscale interface confinement of ultrafast spin transfer torque driving non-uniform spin dynamics. *Nat. Commun.* **8**, 15007 (2017).

4. Tengdin, P. *et al.* Critical behavior within 20 fs drives the out-of-equilibrium laser-induced magnetic phase transition in nickel. *Sci. Adv.* **4**, eaap9744 (2018).

5. Zahn, D. *et al.* Lattice dynamics and ultrafast energy flow between electrons, spins, and phonons in a 3d ferromagnet. *Phys. Rev. Res.* **3**, 023032 (2021).

6. Pankratova, M. *et al.* Heat-conserving three-temperature model for ultrafast demagnetization in nickel. *Phys. Rev. B* **106**, 174407 (2022).

7. Nolting, W. & Ramakanth, A. *Quantum Theory of Magnetism*. (Springer Berlin Heidelberg, Berlin, Heidelberg, 2009). doi:10.1007/978-3-540-85416-6.

8. Weißenhofer, M. & Oppeneer, P. M. Ultrafast Demagnetization Through Femtosecond Generation of Non‐Thermal Magnons. *Adv. Phys. Res.* (2024) doi:10.1002/apxr.202300103.

9. Ma, P.-W., Dudarev, S. L. & Woo, C. H. Spin-lattice-electron dynamics simulations of magnetic materials. *Phys. Rev. B* **85**, 184301 (2012).

10. Pankratova, M. *et al.* Coupled atomistic spin-lattice simulations of ultrafast demagnetization in 3d ferromagnets. *Sci. Rep.* **14**, 8138 (2024).

11. Strungaru, M. *et al.* Spin-lattice dynamics model with angular momentum transfer for canonical and microcanonical ensembles. *Phys. Rev. B* **103**, 024429 (2021).

12. Rouzegar, R. *et al.* Laser-induced terahertz spin transport in magnetic nanostructures arises from the same force as ultrafast demagnetization. *Phys. Rev. B* **106**, 144427 (2022).

13. Seifert, T. S. *et al.* Terahertz spectroscopy for all-optical spintronic characterization of the spin-Hall-effect metals Pt, W and Cu 80 Ir 20. *J. Phys. D. Appl. Phys.* **51**, 364003 (2018).

14. Nádvorník, L. *et al.* Broadband Terahertz Probes of Anisotropic Magnetoresistance Disentangle Extrinsic and Intrinsic Contributions. *Phys. Rev. X* **11**, 021030 (2021).

15. Reiss, D. A. & Brouwer, P. W. Finite-frequency spin conductance of the interface between a ferro- or ferrimagnetic insulator and a normal metal. *Phys. Rev. B* **106**, 144423 (2022).

16. Brataas, A., Nazarov, Y. V. & Bauer, G. E. W. Finite-Element Theory of Transport in Ferromagnet–Normal Metal Systems. *Phys. Rev. Lett.* **84**, 2481–2484 (2000).

17. Reiss, D. A., Kampfrath, T. & Brouwer, P. W. Theory of spin-Hall magnetoresistance in the ac terahertz regime. *Phys. Rev. B* **104**, 024415 (2021).

18. Zwierzycki, M., Tserkovnyak, Y., Kelly, P. J., Brataas, A. & Bauer, G. E. W. First-principles study of magnetization relaxation enhancement and spin transfer in thin magnetic films. *Phys. Rev. B* **71**, 064420 (2005).

19. Beens, M., Duine, R. A. & Koopmans, B. S-d model for local and nonlocal spin dynamics in laser-excited magnetic heterostructures. *Phys. Rev. B* **102**, 054442 (2020).

20. Remy, Q. Ultrafast magnetization reversal in ferromagnetic spin valves: An s−d model perspective. *Phys. Rev. B* **107**, 174431 (2023).

21. Tveten, E. G., Brataas, A. & Tserkovnyak, Y. Electron-magnon scattering in magnetic heterostructures far out of equilibrium. *Phys. Rev. B* **92**, 180412 (2015).

22. Manchon, A., Li, Q., Xu, L. & Zhang, S. Theory of laser-induced demagnetization at high temperatures. *Phys. Rev. B* **85**, 064408 (2012).

23. Potter, H. H. The magneto-caloric effect and other magnetic phenomena in iron. *Proc. R. Soc. London. Ser. A, Contain. Pap. a Math. Phys. Character* **146**, 362–387 (1934).

24. Korenman, V., Murray, J. L. & Prange, R. E. Local-band theory of itinerant ferromagnetism. I. Fermi-liquid theory. *Phys. Rev. B* **16**, 4032–4047 (1977).

25. Dusabirane, F., Leckron, K., Rethfeld, B. & Schneider, H. C. Interplay of Electron-Magnon Scattering and Spin-Orbit Induced Electronic Spin-Flip Scattering in a two-band Stoner model.

26. Kübler, J. *Theory of Itinerant Electron Magnetism*. (Oxford University Press, 2009).
